# Supplementary material for: An Investigation of the Inverted Structure of a PBDB:T/PZT:C1-Based Polymer Solar Cell
Source: MDPI journal article supplement (doi:10.3390/polym15244623), 2023-12-05
Supplement: s1 [file s1]

## Supplementary Data

Article

# An Investigation of the Inverted Structure of A PBDB:T/PZT:C1-Based Polymer Solar Cell

Tahani I. Al-Muhimeed <sup>1</sup>, Shareefah Alahmari <sup>1</sup>, Muhammad Ahsan <sup>2</sup> and Mostafa M. Salah <sup>3,\*</sup>

<sup>1</sup> Department of Chemistry, College of Sciences, King Saud University, P.O. Box 2455, Riyadh 11451, Saudi Arabia; talmuhimeed@ksu.edu.sa (T.I.A.-M.); salahmariy@ksu.edu.sa (S.A.)

<sup>2</sup> Department of Measurements and Control Systems, Silesian University of Technology, 44-100 Gliwice, Poland; muhammad.ahsan@polsl.pl

<sup>3</sup> Electrical Engineering Department, Future University in Egypt, Cairo 11835, Egypt

\* Correspondence: mostafa.abdulkhalek@fue.edu.eg

### Materials' Names.

| Abbreviation | Full-Names                                                                                                                                                                                                  |
|--------------|-------------------------------------------------------------------------------------------------------------------------------------------------------------------------------------------------------------|
| PBDB-T       | Poly[(2,6-(4,8-bis(5-(2-ethylhexyl)thiophen-2-yl)-benzo[1,2-b:4,5-b']dithiophene))-alt-(5,5-(1',3'-di-2-thienyl-5',7'-bis(2-ethylhexyl)benzo[1',2'-c:4',5'-c']dithiophene-4,8-dione)]                       |
| PZT          | lead zirconate titanate (Pb[Zr(x)Ti(1-x)]O <sub>3</sub> )                                                                                                                                                   |
| ITO          | Indium tin oxide                                                                                                                                                                                            |
| PEDOT:PSS    | poly(3,4-ethylenedioxythiophene) polystyrene sulfonate                                                                                                                                                      |
| PFN-Br       | Poly(9,9-bis(3'-(N,N-dimethyl)-N-ethylammonium-propyl-2,7-fluorene)-alt-2,7-(9,9-dioctylfluorene))dibromide                                                                                                 |
| CuI          | Copper Iodide                                                                                                                                                                                               |
| P3HT         | Regioregular poly(3-hexylthiophene)                                                                                                                                                                         |
| PCBM         | fullerene derivative [6,6]-phenyl-C <sub>61</sub> -butyric acid methyl ester                                                                                                                                |
| Zn(O,S)      | Zinc oxysulphide                                                                                                                                                                                            |
| Ag           | Silver                                                                                                                                                                                                      |
| PM6          | Poly[(2,6-(4,8-bis(5-(2-ethylhexyl-3-fluoro)thiophen-2-yl)-benzo[1,2-b:4,5-b']dithiophene))-alt-(5,5-(1',3'-di-2-thienyl-5',7'-bis(2-ethylhexyl)benzo[1',2'-c:4',5'-c']dithiophene-4,8-dione)]              |
| Y6           | thienothienopyrrolo-thienothienoindole (TTP-TTI) core base and 2-(5,6-difluoro-3-oxo-2,3-dihydro-1H-inden-1-ylidene)malononitrile (2FIC)                                                                    |
| PN-Se        | Polyphosphazenes-selenium                                                                                                                                                                                   |
| PDINN        | N,N'-Bis[3-[3-(Dimethylamino)propylamino]propyl]perylene-3,4,9,10-tetracarboxylic diimide                                                                                                                   |
| PY           | Pyridine                                                                                                                                                                                                    |
| PTB7         | Poly [[4,8-bis[(2-ethylhexyl)oxy]benzo[1,2-b:4,5-b']dithiophene-2,6-diyl]] [3-fluoro-2-[(2-ethylhexyl)carbonyl]thieno[3,4-b]thiophenediyl ]]                                                                |
| ZrAcAc       | zirconium acetylacetonate                                                                                                                                                                                   |
| D18          | Poly[(2,6-(4,8-bis(5-(2-ethylhexyl-3-fluoro)thiophen-2-yl)-benzo[1,2-b:4,5-b']dithiophene))-alt-5,5'-(5,8-bis(4-(2-butyloctyl)thiophen-2-yl)dithieno[3',2':3,4;2'',3'':5,6]benzo[1,2-c][1,2,5]thiadiazole)] |
| N3           | azide Azide ion Hydrazoate Azide anion                                                                                                                                                                      |
